# Supplementary material for: TNF antagonist sensitizes synovial fibroblasts to ferroptotic cell death in collagen-induced arthritis mouse models
Source: PubMed Central journal article supplement (PMC8813949; doi:10.1038/s41467-021-27948-4), 2022-02-03
Supplement: 41467_2021_27948_MOESM1_ESM.pdf [file 41467_2021_27948_MOESM1_ESM.pdf]

## **Supplementary Information**

TNF Antagonist Sensitizes Synovial Fibroblasts to Ferroptotic Cell Death in Collagen-induced Arthritis Mouse Models

First Authors: Jiao Wu, Zhuan Feng, Liang Chen, Yong Li

Corresponding Authors: Jiao Wu, Xuejun Jiang, Zhi-Nan Chen & Ping Zhu

Supplementary Figures 1-12

Supplementary Tables 1-7

## Supplementary Figure 1

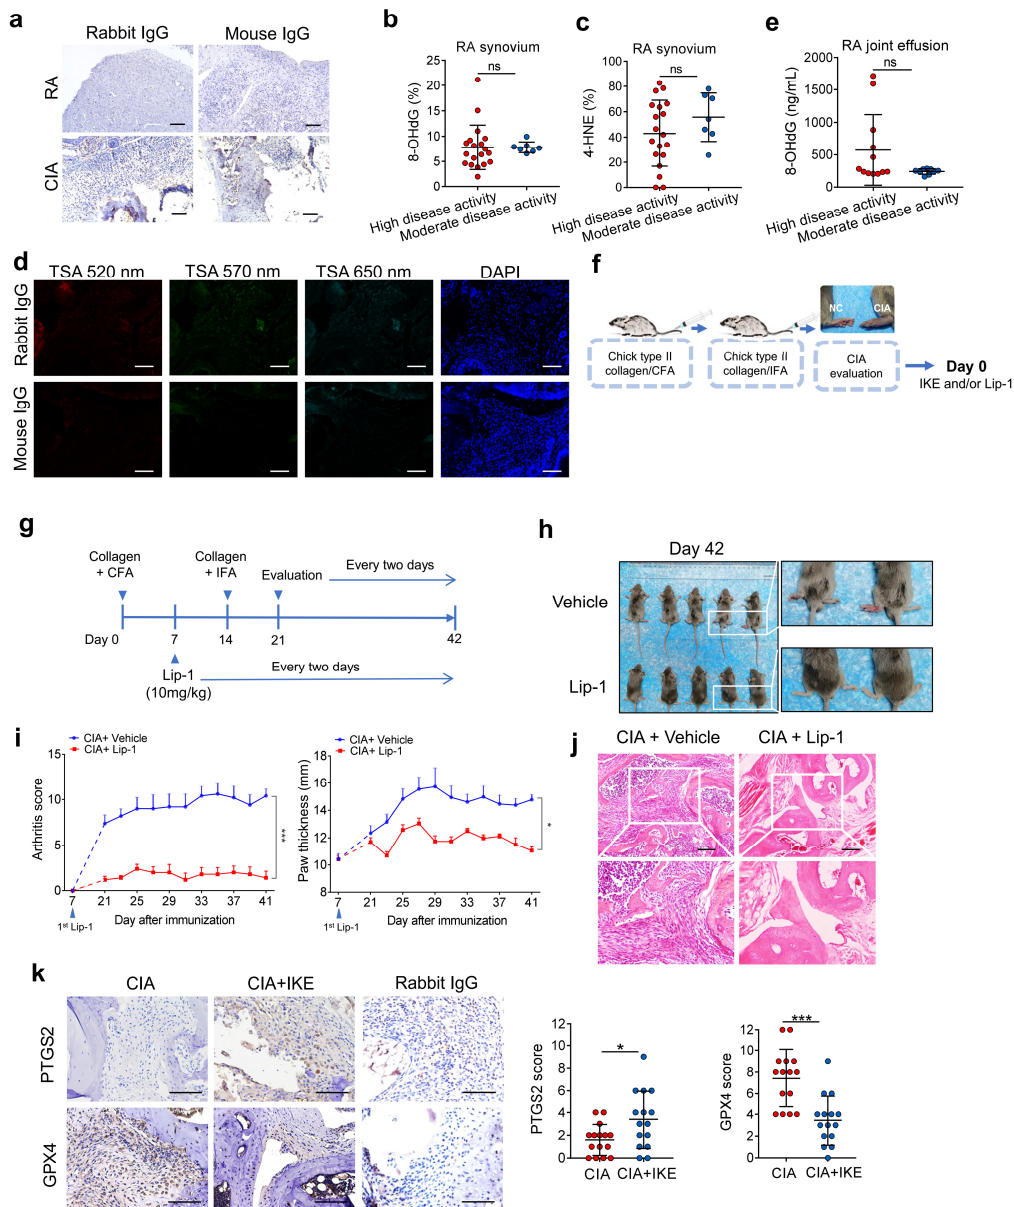

**Supplementary Fig. 1. IKE induces ferroptosis in fibroblast populations from the synovium of RA patients.** **a** Immunohistochemistry on formalin-fixed paraffin embedded human RA synovium or mouse CIA joints using 10  $\mu\text{g/mL}$  of rabbit IgG1 isotype control or mouse IgG1 isotype control followed by an anti-mouse/rabbit avidin-biotin HRP detection system. Nuclei are counterstained with hematoxylin. Scale bars, 100  $\mu\text{m}$ . The isotype control was repeated independently along with the staining of different molecules with similar results. **b** Quantitative comparison of 8-OHdG staining in the synovium of RA patients with different disease activities. High disease activity,  $n = 19$  RA patients; moderate disease activity,  $n = 7$  RA patients. ns,  $P = 0.9846$ ; two-tailed t test. **c** Quantitative comparison of 4-HNE staining in the synovium of RA patients with different disease activities. High disease activity,  $n = 19$  RA patients; moderate disease activity,  $n = 7$  RA patients. ns,  $P = 0.2505$ ; two-tailed t test. **d** Fluorescent multiplex IHC staining of mouse CIA joints using 10  $\mu\text{g/mL}$  of rabbit IgG1 isotype control or mouse IgG1

isotype control followed by TSA detection kit. Scale bars, 200  $\mu\text{m}$ . The isotype control was repeated independently along with the staining of different molecules with similar results. **e** 8-OHdG concentration in the joint fluid of RA patients with different disease activities. High disease activity,  $n = 12$  RA patients; moderate disease activity,  $n = 8$  RA patients. ns,  $P = 0.0853$ ; two-tailed t test. **f** Establishment of a CIA mouse model and administration of IKE and/or Lip-1 treatment. **g** Establishment of a CIA mouse model and administration of Lip-1 treatment started before the shown up of significant phenotype of arthritis. **h** Representative images of the paws from mice with or without administration of Lip-1 42 days after immunization with type II collagen. **i** Joint inflammation measured by arthritis score (left) and paw thickness (right) in CIA model mice that were intraperitoneally injected with Lip-1 every two days for 5 weeks.  $***P = 0.0008$ ,  $*P = 0.0111$ ; two-way repeated measure ANOVA.  $n = 5$  mice for each group. **j** H&E staining images of representative joints in CIA model mice with or without administration of Lip-1. Scale bars, 100  $\mu\text{m}$ . Similar results were observed from 15 joints tested for each group. **k** Immunohistochemical staining and scoring of PTGS2 and GPX4 in the joints of CIA model mice.  $n = 15$  joints for each group.  $*P = 0.0228$ ,  $***P = 0.0002$ ; two-tailed t test. Scale bars, 100  $\mu\text{m}$ . Data in **i** are presented as mean  $\pm$  SEM. Other data are presented as mean  $\pm$  SD. Source data are provided as a Source Data file.

## Supplementary Figure 2

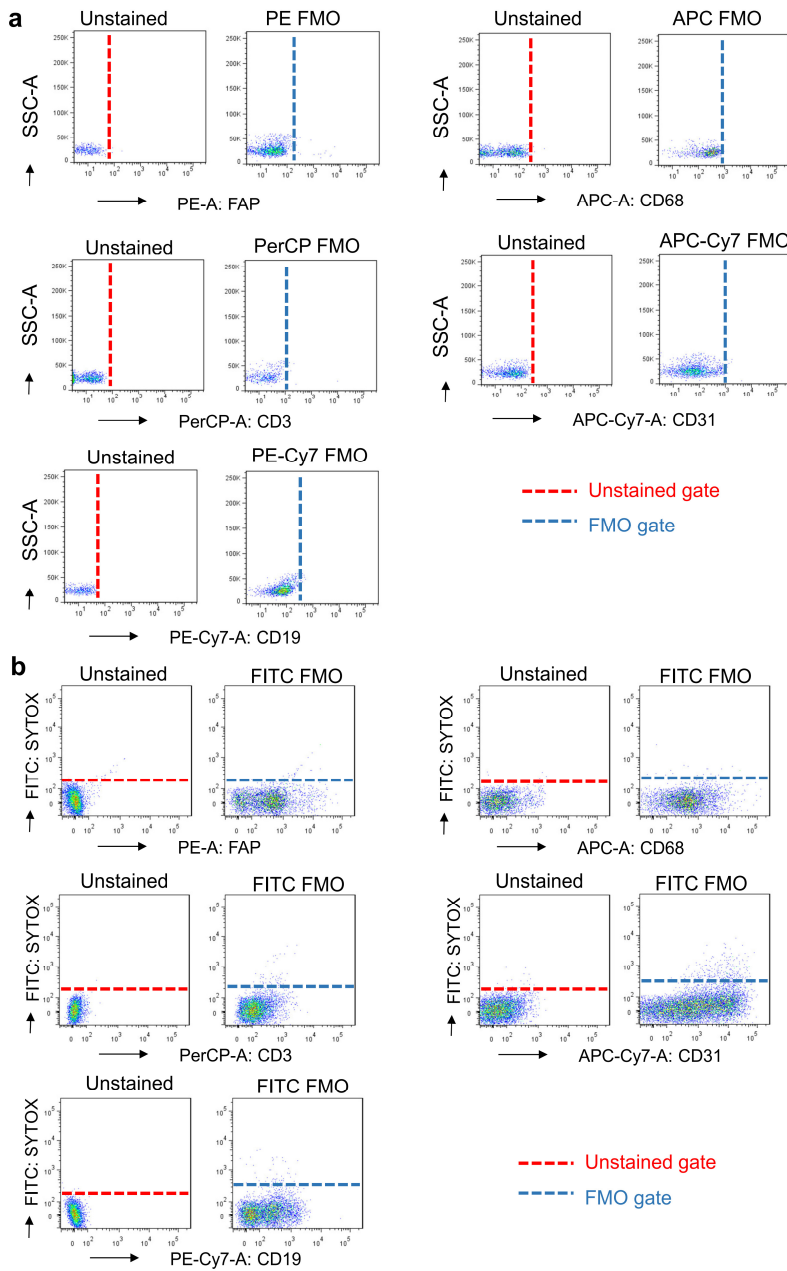

**Supplementary Fig. 2. FMO controls used in Fig. 2c. a** FMO for PE-FAP $\alpha$ , APC-CD68, PerCP-CD3, APC-Cy7-CD31 and PE-Cy7-CD19. **b** FMO for SYTOX Green.

### Supplementary Figure 3

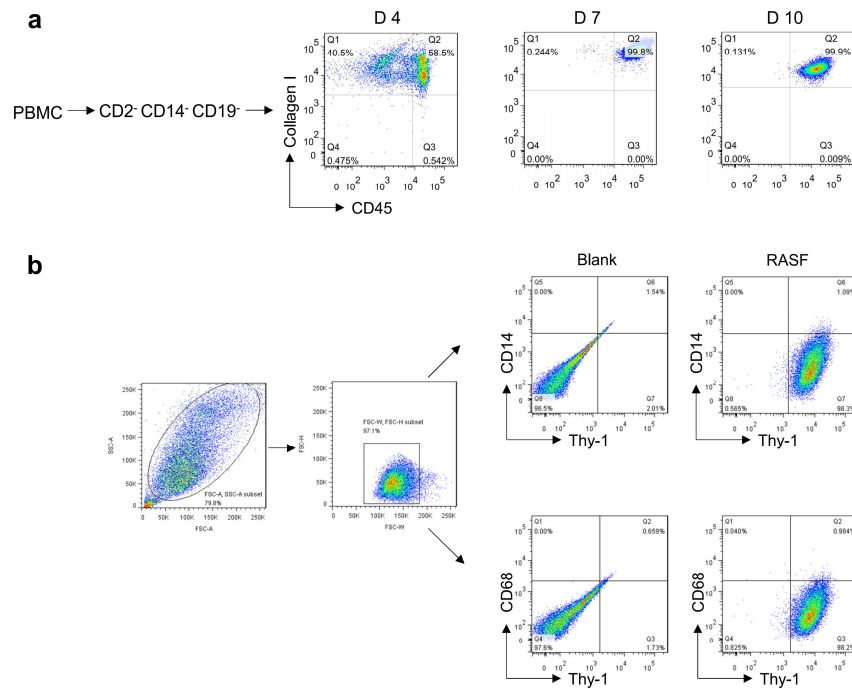

**Supplementary Fig. 3. Isolation and identification of circulating fibroblasts and synovial fibroblasts.** **a** CD2<sup>-</sup>CD14<sup>-</sup>CD19<sup>-</sup> cells from PBMCs of RA patients were cultured for the indicated times, and the percentages of CD45<sup>+</sup> Collagen 1<sup>+</sup> cells were analyzed by flow cytometry. **b** Flow cytometric analysis of digested synovial cells cultured from RA patients, and fibroblasts were identified as the CD14<sup>-</sup> CD68<sup>-</sup> Thy1<sup>+</sup> population by flow cytometry.

## Supplementary Figure 4

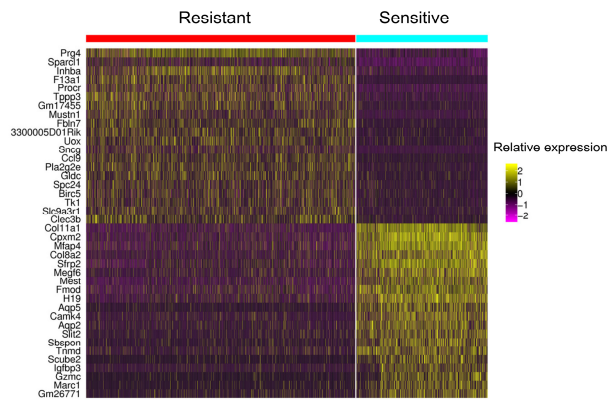

**Supplementary Fig. 4. Differential gene expression of ferroptosis-sensitive and ferroptosis-resistant fibroblast subsets.** The heat map shows the expression of the top 20 genes (by *P* value) discovered that were considered significant and conserved marker genes for each subset.

## Supplementary Figure 5

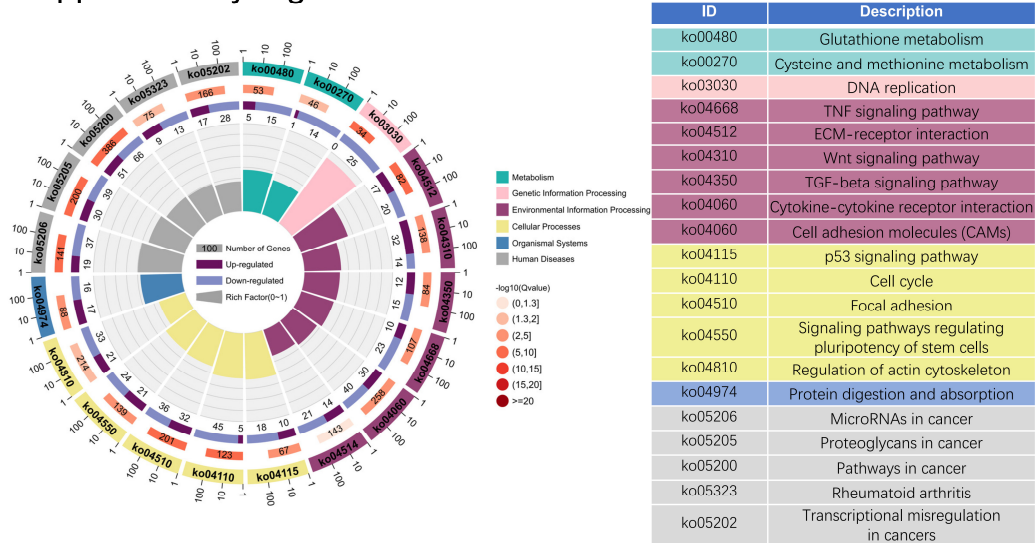

**Supplementary Fig. 5. KEGG (Kyoto Encyclopedia of Genes and Genomes) enrichment analysis of differentially expressed genes in ferroptosis-sensitive and ferroptosis-resistant fibroblast subsets.** The first lap indicates the KEGG pathway; the second lap indicates the number of genes in the genome background and  $-\log_{10}$  Q values for enrichment of the differentially expressed genes for the KEGG pathway; the third lap indicates the ratio of the upregulated genes (purple) and downregulated genes (blue); and the fourth lap indicates the rich factor of each pathway.

## Supplementary Figure 6

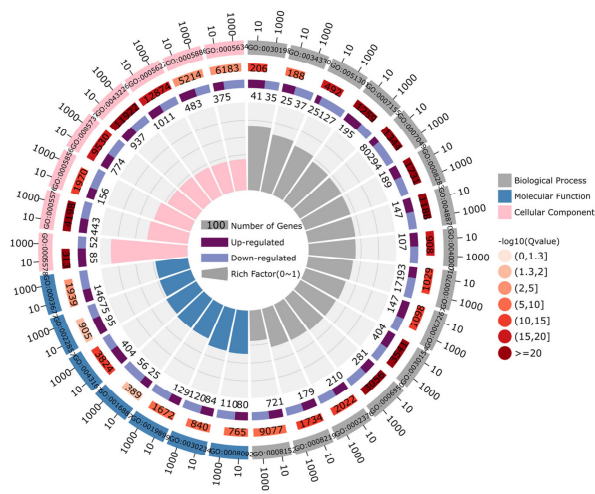

| ID         | Description                        |
|------------|------------------------------------|
| GO:0008219 | cell death                         |
| GO:0006950 | response to stress                 |
| GO:0008283 | cell proliferation                 |
| GO:0051301 | cell division                      |
| GO:0040007 | growth                             |
| GO:0007049 | cell cycle                         |
| GO:0007155 | cell adhesion                      |
| GO:0048870 | cell motility                      |
| GO:0030198 | extracellular matrix organization  |
| GO:0034330 | cell junction organization         |
| GO:0007010 | cytoskeleton organization          |
| GO:0007267 | cell-cell signaling                |
| GO:0008152 | metabolic process                  |
| GO:0002376 | immune system process              |
| GO:0030154 | cell differentiation               |
| GO:0043167 | ion binding                        |
| GO:0008092 | cytoskeletal protein binding       |
| GO:0030234 | enzyme regulator activity          |
| GO:0019899 | enzyme binding                     |
| GO:0003677 | DNA binding                        |
| GO:0016887 | ATPase activity                    |
| GO:0022857 | transmembrane transporter activity |
| GO:0005576 | extracellular region               |
| GO:0005578 | proteinaceous extracellular matrix |
| GO:0043226 | organelle                          |
| GO:0005622 | intracellular                      |
| GO:0005737 | cytoplasm                          |
| GO:0005856 | cytoskeleton                       |
| GO:0005634 | nucleus                            |
| GO:0005886 | plasma membrane                    |

**Supplementary Fig. 6. GO (Gene Ontology) enrichment analysis of differentially expressed genes in ferroptosis-sensitive and ferroptosis-resistant fibroblast subsets.**



## Supplementary Figure 7

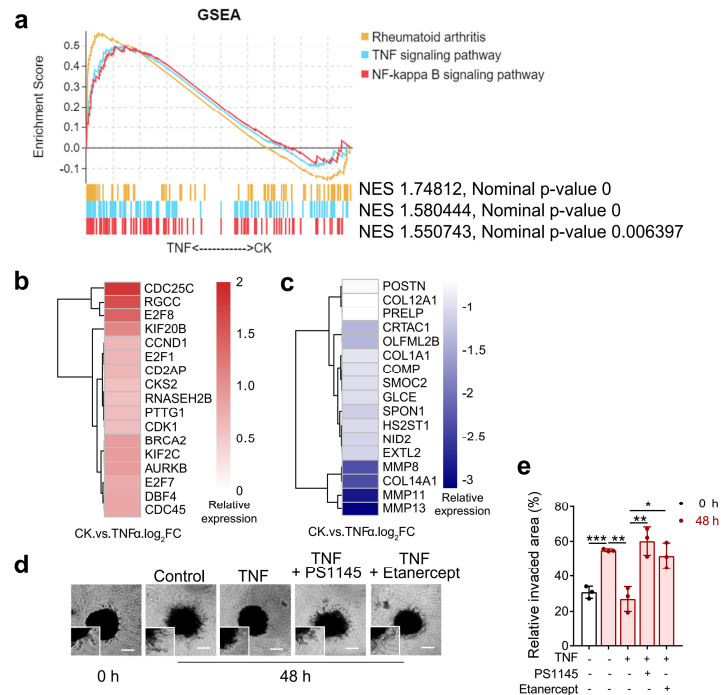

**Supplementary Fig. 7. Long-term exposure of fibroblasts to TNF increases the proliferation potential and decreases the genes related to extracellular matrix in fibroblasts.** **a-c** Fibroblasts were stimulated with TNF (20 ng/ml) for 96 h, and RNA sequencing was performed. **a** Enrichment plots of GO\_Rheumatoid, TNF signaling pathway and NF- $\kappa$ B signaling pathway gene sets among TNF-stimulated fibroblasts compared to control fibroblasts as identified by GSEA. The p-value is calculated through permutation tests. **b** Genes enriched in the GO\_Cell division gene set (left) and KEGG\_DNA replication gene set among the ferroptosis-resistant subset were cross-referenced against genes that showed increased expression after TNF treatment of fibroblasts from individuals with RA, and the expression of selected mRNA transcripts is shown. **c** Genes enriched in the GO\_Proteinaceous extracellular matrix gene set (left) and KEGG\_Glycosaminoglycan biosynthesis gene set among the ferroptosis-sensitive subset were cross-referenced against genes that were decreased after treatment of RA fibroblasts with TNF, and the expression of selected mRNA transcripts is shown. **d** Representative images of fibroblast spheroids grown in Matrigel and treated with TNF, PS1145 and etanercept for the indicated times. Scale bars, 100  $\mu$ m. **e** The protrusion area extruded from the main body of the spheroid was monitored.  $n = 3$  biologically independent samples per condition. \*\*\* $P = 0.0003$ ; \*\* $P = 0.0023$ , 0.0058 (left to right); \* $P = 0.0135$ ; two-tailed t-test. All data are presented as mean  $\pm$  SD. Source data are provided as a Source Data file.

## Supplementary Figure 8

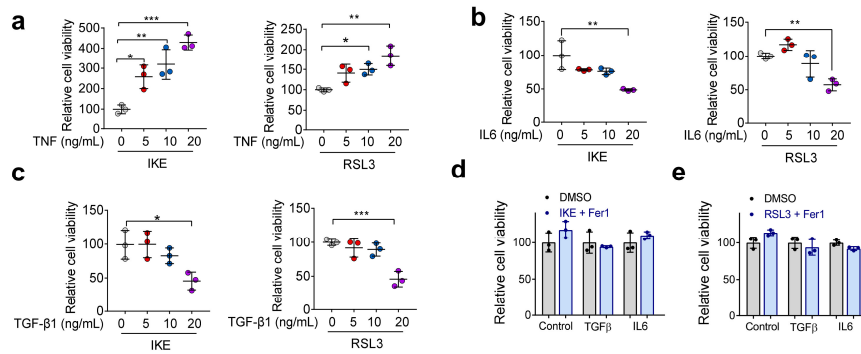

**Supplementary Fig. 8. TNF protects fibroblasts against ferroptosis, while IL-6 and TGF- $\beta$  sensitize fibroblasts to ferroptosis.** **a-c** Relative viability of fibroblasts from individuals with RA that are primed with different concentrations of TNF (**a**), IL-6 (**b**) and TGF- $\beta$  (**c**), followed by treatment with IKE (1  $\mu$ M, 28 h) or RSL3 (0.125  $\mu$ M, 14 h).  $n = 3$  biologically independent samples per condition. **a** Left, \*  $P = 0.0231$ , \*\*  $P = 0.0035$ , \*\*\*  $P = 0.0002$ . Right, \*  $P = 0.0384$ , \*\*  $P = 0.0020$ ; one-way ANOVA followed by multiple comparisons. **b** Left, \*\*  $P = 0.0022$ . Right, \*\*  $P = 0.0097$ ; one-way ANOVA followed by multiple comparisons. **c** Left, \*  $P = 0.0205$ . Right, \*\*\*  $P = 0.0009$ ; one-way ANOVA followed by multiple comparisons. **d-e** Relative viability of fibroblasts primed with TGF- $\beta$  or IL-6, followed by treatment with IKE (**d**) or RSL3 (**e**) in the presence of Fer1.  $n = 3$  biologically independent samples per condition. All data are presented as mean  $\pm$  SD. Source data are provided as a Source Data file.

## Supplementary Figure 9

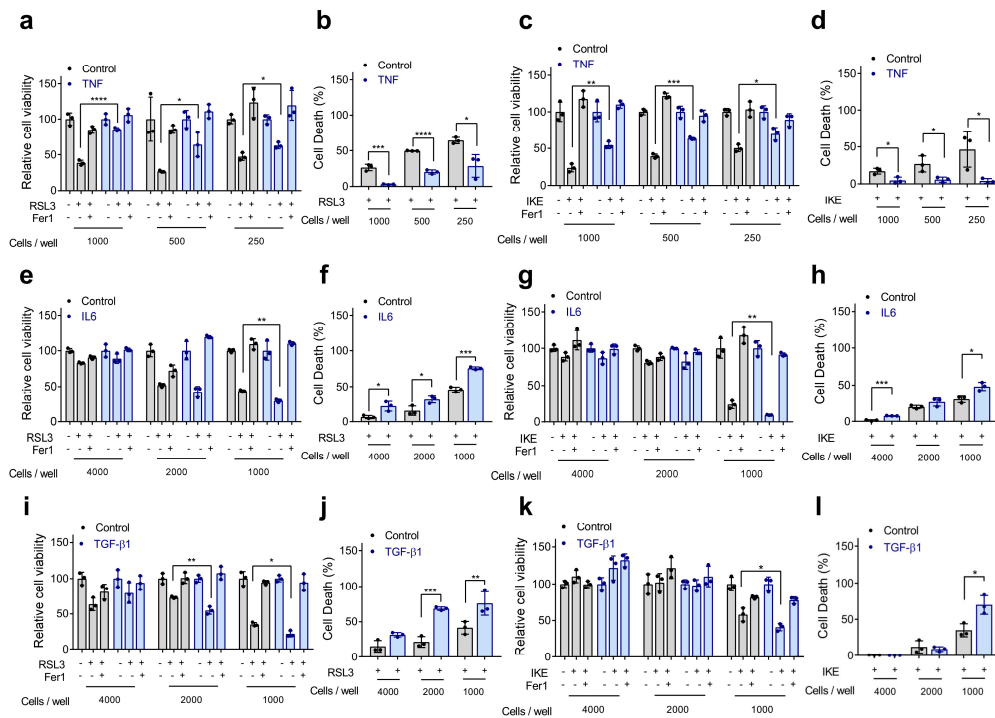

**Supplementary Fig. 9. TNF reduces ferroptosis susceptibility in a cell density-independent manner.** **a-d** Fibroblasts from individuals with RA were seeded at the indicated density in 96-well plates and primed with TNF. Relative viability was measured after RSL3 treatment for 12 h (**a**) or IKE treatment for 26 h (**c**), and cell death was measured after RSL3 treatment for 10 h (**b**) or IKE treatment for 24 h (**d**). Cells were stained with hoechst 33342 (0.1  $\mu\text{g}/\text{mL}$ ) to monitor total cell number, and with SYTOX green (5 nM) to monitor cell death. **a** \*\*\*\* $P < 0.0001$ , \* $P = 0.0194$ , 0.0171 (left to right); two-tailed t-test. **b** \*\*\*  $P = 0.0009$ , \*\*\*\* $P < 0.0001$ , \* $P = 0.0198$ ; two-tailed t-test. **c** \*\*  $P = 0.0018$ , \*\*\* $P = 0.0002$ , \* $P = 0.0280$ ; two-tailed t-test. **d** \* $P = 0.0215$ , 0.0325, 0.0382 (left to right); two-tailed t-test. **e-h** Fibroblasts from individuals with RA and set at the indicated density were primed with IL-6 and then treated with RSL3 or IKE, and relative cell viability and cell death were measured as described above. **e** \*\* $P = 0.0010$ ; two-tailed t-test. **f** \* $P = 0.0217$ , 0.0277 (left to right), \*\*\*  $P = 0.0002$ ; two-tailed t-test. **g** \*\*  $P = 0.0012$ ; two-tailed t-test. **h** \*\*\* $P = 0.0003$ , \* $P = 0.0115$ ; two-tailed t-test. **i-l** Fibroblasts from individuals with RA and set at the indicated density were primed with TGF- $\beta$  and then treated with RSL3 or IKE, and relative cell viability and cell death were measured as described above. **i** \*\* $P = 0.0045$ , \* $P = 0.0107$ ; two-tailed t-test. **j** \*\*\* $P = 0.0005$ , \*\*  $P = 0.0021$ ; two-tailed t-test. **k** \*  $P = 0.0465$ ; two-tailed t-test. **l** \* $P = 0.0182$ ; two-tailed t-test.  $n = 3$  biologically independent samples per condition. All data are presented as mean  $\pm$  SD. Source data are provided as a Source Data file.

## Supplementary Figure 10

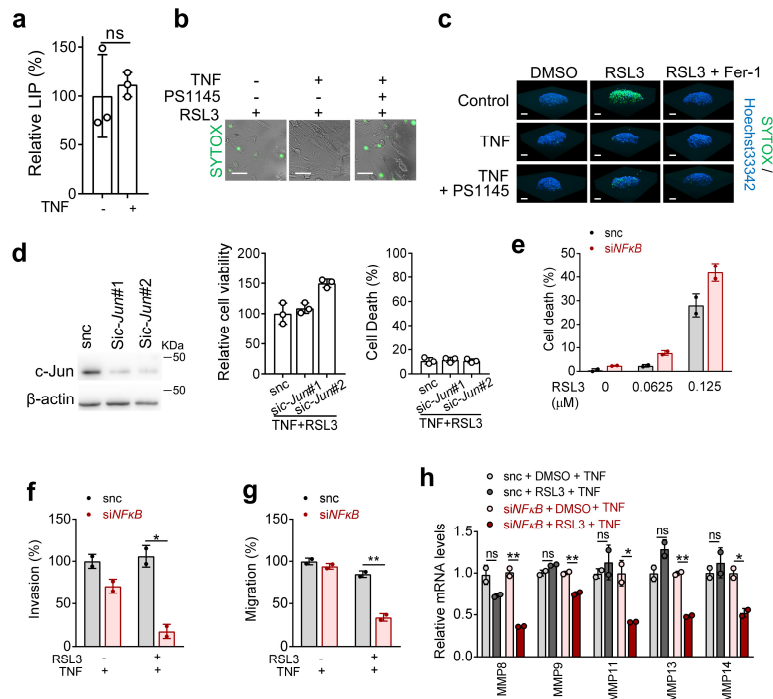

**Supplementary Fig. 10. Sublethal doses of ferroptosis-inducers modulates the aggressive behaviors of RA fibroblasts.** **a** Cellular labile iron pool (LIP) level in fibroblasts treated with TNF.  $n = 3$  biologically independent samples per condition. ns,  $P = 0.6721$ ; two-tailed t test. **b** Microscopy showing cell death. Scale bars, 20  $\mu$ m. Similar results were observed from 3 times independent experiments. **c** Three-dimensional spheroids formed by fibroblasts were treated as indicated. Dead cells were stained with SYTOX green, while all nuclei were stained with Hoechst 33342 (blue). Scale bars, 100  $\mu$ m. **d** Left, western blotting analysis of c-Jun expression in fibroblasts transfected with scramble siRNA or either of two independent siRNAs targeting c-Jun, which is a component of AP-1 (*sic-Jun#1*, *sic-Jun#2*). Right, relative viability and cell death of fibroblasts transfected with scramble siRNA or siRNA targeting c-Jun and treated with TNF followed by RSL3.  $n = 3$  biologically independent samples per condition. **e** Cell death of fibroblasts transfected with scramble siRNA or siRNA targeting NF- $\kappa$ B p65, and then treated with indicated concentrations of RSL3.  $n = 2$  biologically independent samples per condition. **f-g** Invasive (**f**) and migrative (**g**) potentials of RA fibroblasts transfected with scramble siRNA or siRNA targeting NF- $\kappa$ B p65, and then treated with TNF followed by RSL3 (0.0625  $\mu$ M), measured by the transwell assay.  $n = 2$  biologically independent samples per condition. \* $P = 0.0147$ , \*\* $P = 0.0065$ ; two-tailed t test. **h** The mRNA levels of MMP8, -9, -11, -13 and -14 in NF- $\kappa$ B p65 knockdown fibroblasts with TNF and RSL3 treatment.  $n = 2$  biologically independent samples per condition. ns,  $P = 0.0911, 0.0644, 0.4768, 0.1108, 0.4827$  (left to right); \* $P = 0.0324, 0.0195$  (left to right); \*\* $P = 0.0049, 0.0072, 0.0015$  (left to right); two-tailed t test. All data are presented as mean  $\pm$  SD. Source data are provided as a Source Data file.

## Supplementary Figure 11

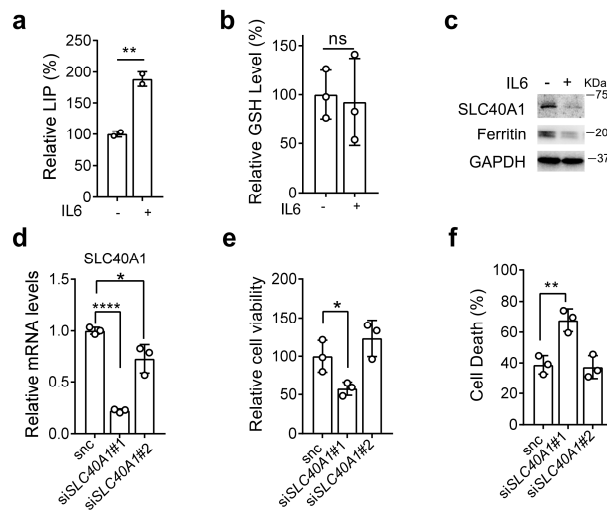

**Supplementary Fig. 11. IL-6 sensitized fibroblasts to ferroptosis.** **a** The LIP level in fibroblasts treated with IL-6.  $n = 2$  biologically independent samples per condition.  $**P = 0.0098$ ; two-tailed t test. **b** Intracellular GSH in fibroblasts treated with IL-6 for 72 h.  $n = 3$  biologically independent samples per condition. ns,  $P = 0.8078$ ; two-tailed t test. **c** Western blotting analysis of SLC40A1 and Ferritin expression in fibroblasts stimulated with IL-6 for 72 h. **d** Relative mRNA levels of SLC40A1 in fibroblasts transfected with scramble siRNA or either of two independent siRNAs targeting SLC40A1 (siSLC40A1#1, siSLC40A1#2).  $n = 3$  biologically independent samples per condition.  $*P = 0.0162$ ,  $****P < 0.0001$ ; one-way ANOVA followed by multiple comparisons. **e-f** Relative viability (**e**) and cell death (**f**) of fibroblasts transfected with scramble siRNA or siRNA targeting SLC40A1 and treated with IL-6 followed by RSL3.  $n = 3$  biologically independent samples per condition.  $*P = 0.0312$ ,  $**P = 0.0063$ ; two-tailed t test. All data are presented as mean  $\pm$  SD. Source data are provided as a Source Data file.

## Supplementary Figure 12

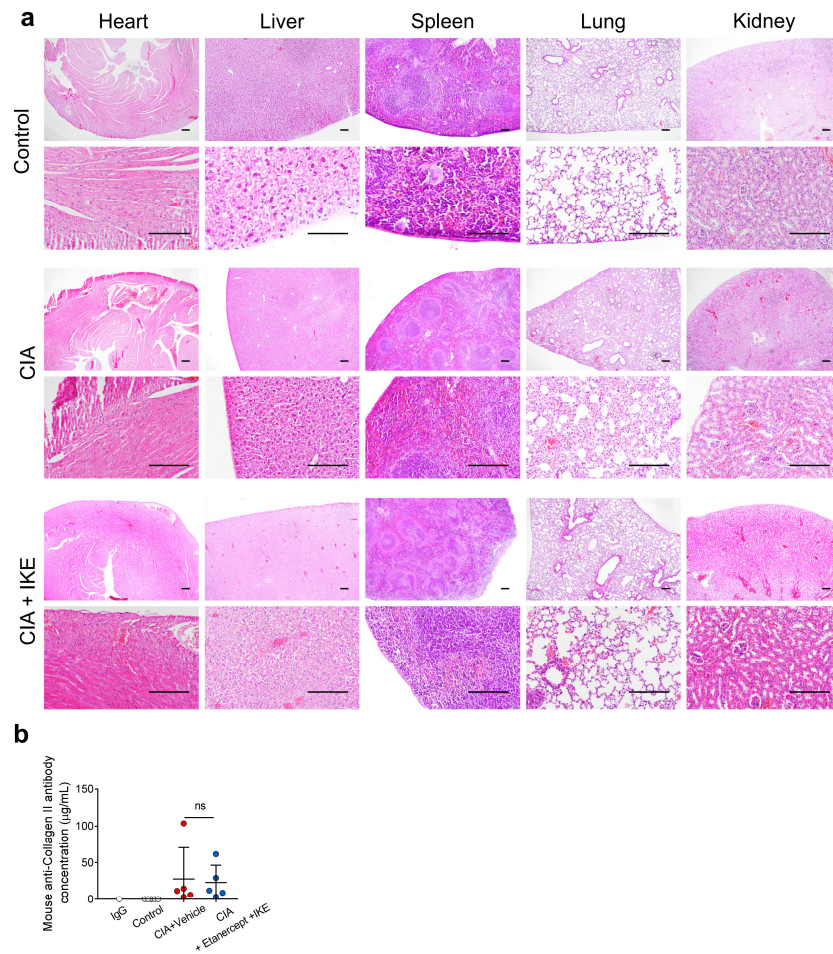

**Supplementary Fig. 12. Pathological changes in organs of CIA mice treated with IKE.** **a** H&E staining images of representative hearts, livers, spleens, lungs and kidneys in control and CIA mice treated with or without IKE (20 mg/kg, twice a week) for 36 days. Scale bars, 200 µm. Similar results were observed from all 5 mice tested for each group. **b** Detection of anti-type II collagen antibody in serum of CIA mice treated with etanercept in combination with IKE, performed with ELISA.  $n = 5$  biologically independent animals per group. ns,  $P = 0.9612$ ; two-tailed t test. Data are presented as mean  $\pm$  SD. Source data are provided as a Source Data file.

Supplementary Table 1. Characteristics of rheumatoid arthritis (RA) individuals and osteoarthritis (OA) individuals for immunohistochemistry studies.

| Characteristics                      | RA                  | OA                  |
|--------------------------------------|---------------------|---------------------|
| Number of patients                   | 26                  | 21                  |
| Age in years, median (IQR)           | 48.0<br>(39.5-54.3) | 55.0<br>(49.5-57.0) |
| Female sex, (%)                      | 14 (53.8)           | 12 (57.1)           |
| Disease duration, year, median (IQR) | 11 (6.8-15.0)       | 12 (7.0-15.0)       |
| ESR, mm/hour, median (IQR)           | 52.5 (21.50-71.25)  | 19.0 (8.50-33.50)   |
| DAS28, median (IQR)                  | 5.76 (4.25-6.04)    | na                  |

Values are presented as median (interquartile range) or number (percentage). IQR, interquartile range, ESR, erythrocyte sedimentation rate; DAS28, 28-joint disease activity score; na, not applicable.

Supplementary Table 2. Characteristics of RA individuals for detection of MDA, 8-OHdG and iron levels in joint fluid.

| Characteristics                      | RA                  |
|--------------------------------------|---------------------|
| Number of patients                   | 20                  |
| Age in years, median (IQR)           | 53.0<br>(50.0-61.3) |
| Female sex, (%)                      | 16 (80.0)           |
| Disease duration, year, median (IQR) | 4.5 (1.1-9.8)       |
| High diseases activity, (%)          | 12 (60)             |
| Moderate diseases activity, (%)      | 8 (40)              |
| ESR, mm/hour, median (IQR)           | 43.5 (31.25-56.25)  |
| DAS28, median (IQR)                  | 6.22 (4.85-6.43)    |

Values are presented as median (interquartile range) or number (percentage). IQR, interquartile range; ESR, erythrocyte sedimentation rate; DAS28, 28-joint disease activity score.



Supplementary Table 3. Characteristics of RA individuals for single-cell RNA sequencing.

| Characteristics                 | RA      |
|---------------------------------|---------|
| Number of patients              | 5       |
| Age in years, average           | 49.8    |
| Female sex, (%)                 | 5 (100) |
| Disease duration, year, average | 7.8     |
| ESR, mm/hour, average           | 38.2    |
| DAS28, average                  | 6.61    |

Values are presented as average or number (percentage). ESR, erythrocyte sedimentation rate; DAS28, 28-joint disease activity score.

Supplementary Table 4. Characteristics of RA individuals for isolation of synovial fibroblasts from joint fluid and circulating fibrocytes from PBMC.

| Characteristics                 | RA       |
|---------------------------------|----------|
| Number of patients              | 6        |
| Age in years, average           | 48.3     |
| Female sex, (%)                 | 4 (66.7) |
| Disease duration, year, average | 0.7      |
| ESR, mm/hour, average           | 47.17    |
| DAS28, average                  | 5.54     |

Values are presented as average or number (percentage). ESR, erythrocyte sedimentation rate; DAS28, 28-joint disease activity score.

Supplementary Table 5. The sequences of siRNA.

| Names of siRNA primers     | Sequences of primers        |
|----------------------------|-----------------------------|
| SLC40A1#1-sense            | GGUGAGUGUUGUUAUUAUAAUU      |
| SLC40A1#1-antisense        | UUAUAUAACAACA-CUCACCUU      |
| SLC40A1#2-sense            | GAGAGACUCYAGAAGUUAUU        |
| SLC40A1#2-antisense        | UUAACUUCUAGAGUCUCUCCU       |
| GCLC#1-sense               | GCUAAUGAGUCUGACCAUdTdT      |
| GCLC#1-antisense           | AAUGGUCAGACUCAUUAGC         |
| GCLC#2-sense               | GUAGUAUUCUGAACUACCUdTdT     |
| GCLC#2-antisense           | AGGUAGUUCAGAAUUAUUCdTdT     |
| p65 #1-sense               | GGACAUUAUGAGACCUUCAAdTdT    |
| p65 #1-antisense           | UUGAAGGUCUCAUAUGUCCdTdT     |
| p65 #2- sense              | GAUGAGAUCUCCUACUGUdTdT      |
| p65 #2- antisense          | ACAGUAGGAAGAUCUCAUdTdT      |
| c-Jun #1- sense            | CAGUGUUGUUUGGUAAAUAAGA      |
| c-Jun #1- antisense        | UUUUUUACAAACAACACUGGG       |
| c-Jun #2- sense            | GCUGAUUACUGUCAAAUAAACA      |
| c-Jun #2- antisense        | UUUAUUGACAGUAAUCAGCUU       |
| Negative Control sense     | UUC UCC GAA CGU GUC ACG UTT |
| Negative Control antisense | ACG UGA CAC GUU CGG AGA ATT |

Supplementary Table 6. The sequences of PCR primers.

| <b>Names of PCR primers</b> | <b>Sequences of PCR primers</b> |
|-----------------------------|---------------------------------|
| huSLC40A1-Forward Primer    | TGGATGGGTTCTCACTTCCTG           |
| huSLC40A1-Reverse Primer    | GTCAATCCTTCGTATTGTGGCAT         |
| huMMP8 -Forward Primer      | AAGTGGGAACGCACTAACTTG           |
| huMMP8-Reverse Primer       | GGATTCCATTGGGTCCATCAAAT         |
| huMMP9-Forward Primer       | TTCCCCTTCACTTTCCTGGGTA          |
| huMMP9-Reverse Primer       | CGCCACGAGGAACAAACTGTAT          |
| huMMP11-Forward Primer      | CCGCAACCGACAGAAGAGG             |
| huMMP11-Reverse Primer      | ATCGCTCCATACCTTTAGGGC           |
| huMMP13-Forward Primer      | TCTTCGGCTTAGAGGTGACTG           |
| huMMP13-Reverse Primer      | CAGAGGAGTTACATCGGACCA           |
| huMMP14-Forward Primer      | CATCTGTGACGGGAACTTTGA           |
| huMMP14-Reverse Primer      | GGCAGTGTTGATGGACGCA             |
| GAPDH-Forward Primer        | GCACCGTCAAGGCTGAGAAC            |
| GAPDH-Reverse Primer        | TGGTGAAGACGCCAGTGGA             |

Supplementary Table 7. Resource information for antibodies.

| Antibody                    | Company                   | Cat#      | Application                           | Dilution                                                   |
|-----------------------------|---------------------------|-----------|---------------------------------------|------------------------------------------------------------|
| FAP                         | Invitrogen                | BMS168    | TSA-based immunofluorescent multiplex | 1:100                                                      |
| FAP $\alpha$                | Abcam                     | ab218164  | TSA-based immunofluorescent multiplex | 1:100                                                      |
| Mfap4                       | Thermo                    | PA5-24865 | TSA-based immunofluorescent multiplex | 1:100                                                      |
| Sparc1                      | Santa Cruz                | sc-514275 | TSA-based immunofluorescent multiplex | 1:100                                                      |
| F4/80                       | Cell Signaling Technology | #70076    | TSA-based immunofluorescent multiplex | 1:500                                                      |
| PerCP anti-CD3              | Biolegend                 | 317338    | Flow cytometric analysis              | 5 $\mu$ l/test                                             |
| PE anti-CD45                | Biolegend                 | 304008    | Flow cytometric analysis              | 5 $\mu$ l/test                                             |
| APC/Cyanine7 CD31           | Biolegend                 | 303120    | Flow cytometric analysis              | 5 $\mu$ l/test                                             |
| APC anti-CD68               | Biolegend                 | 333810    | Flow cytometric analysis              | 5 $\mu$ l/test                                             |
| PE/Cyanine7 anti-CD19       | Biolegend                 | 302216    | Flow cytometric analysis              | 5 $\mu$ l/test                                             |
| PE Goat anti-mouse IgG      | Biolegend                 | 405307    | Flow cytometric analysis              | 5 $\mu$ l/test                                             |
| PE anti-human CD14          | Biolegend                 | 367104    | Flow cytometric analysis              | 5 $\mu$ l/test                                             |
| FAP                         | Invitrogen                | BMS168    | Flow cytometric analysis              | 1:100                                                      |
| FITC anti-human CD90 (Thy1) | Biolegend                 | 328107    | Flow cytometric analysis              | 5 $\mu$ l/test                                             |
| FITC anti-Collagen I        | Sigma-Aldrich             | FCMAB412F | Flow cytometric analysis              | 5 $\mu$ l/test                                             |
| Dynabeads anti-CD19         | Invitrogen                | 11143D    | Isolation of circulating fibrocytes   | Depletion: 50 $\mu$ l beads/2.5 x 10 <sup>7</sup> cells/ml |
| Dynabeads anti-CD2          | Invitrogen                | 11159D    | Isolation of circulating fibrocytes   | Depletion: 50 $\mu$ l beads/2.5 x 10 <sup>7</sup> cells/ml |
| Dynabeads anti-CD14         | Invitrogen                | 11149D    | Isolation of circulating fibrocytes   | Depletion: 50 $\mu$ l beads/2.5 x 10 <sup>7</sup> cells/ml |
| SLC40A1                     | Abcam                     | ab78066   | Western blotting                      | 1:200                                                      |
| GCLM                        | HuaBio                    | ET1705-87 | Western blotting                      | 1:500                                                      |

|                            |                 |             |                                       |        |
|----------------------------|-----------------|-------------|---------------------------------------|--------|
| GCLC                       | HuaBio          | ET1704-38   | Western blotting                      | 1:500  |
| IκBα                       | HuaBio          | ET1603-6    | Western blotting                      | 1:500  |
| phospho-IκBα               | HuaBio          | ET1609-78   | Western blotting                      | 1:500  |
| NF-κB p65                  | HuaBio          | ET1603-12   | Western blotting                      | 1:500  |
| SLC7A11                    | Abcam           | ab175186    | Western blotting                      | 1:1000 |
| c-Jun                      | Proteintech     | 24909-1-AP  | Western blotting                      | 1:1000 |
| ferritin                   | Abcam           | ab75973     | Western blotting                      | 1:1000 |
| GAPDH                      | HuaBio          | R1210-1     | Western blotting                      | 1:2000 |
| β-actin                    | HuaBio          | R1102-1     | Western blotting                      | 1:2000 |
| 4-HNE                      | Abcam           | ab48506     | Immunohistochemistry assay            | 1:25   |
| 4-HNE                      | Abcam           | ab46545     | Immunohistochemistry assay            | 1:50   |
| PTGS2                      | Abcam           | ab179800    | Immunohistochemistry assay            | 1:500  |
| GPX4                       | Abcam           | ab125066    | Immunohistochemistry assay            | 1:50   |
| FAPα                       | Abcam           | ab53066     | Immunohistochemistry assay            | 1:50   |
| GCLC                       | Abcam           | ab53179     | Immunohistochemistry assay            | 1:100  |
| GCLM                       | Abcam           | ab126704    | Immunohistochemistry assay            | 1:50   |
| p-NF-κB p65                | Thermo Fisher   | 44-711G     | Immunohistochemistry assay            | 1:50   |
| 8-OHdG                     | Abcam           | ab48508     | Immunohistochemistry assay            | 1:100  |
| VCAM-1                     | Abcam           | ab134047    | TSA-based immunofluorescent multiplex | 1:500  |
| 4-HNE                      | Abcam           | ab46545     | TSA-based immunofluorescent multiplex | 1:50   |
| CD248                      | Abcam           | ab217535    | TSA-based immunofluorescent multiplex | 1:200  |
| TNFR1                      | Sino Biological | 10872-R111  | blocking                              | 1:400  |
| TNFR2                      | Sino Biological | 10417-R00N6 | blocking                              | 1:200  |
| rabbit IgG Isotype Control | Invitrogen      | 31235       | IgG Isotype Control                   | 1:100  |
| mouse IgG Isotype Control  | Invitrogen      | 14-4714-82  | IgG Isotype Control                   | 1:100  |
